# Supplementary material
Source: PubMed Central journal article supplement (PMC3504614)

**Figure 2S Micronuclei analysis in 3mo and 18mo normal NSPCs**

| Age                           | 3mo | 18mo |
|-------------------------------|-----|------|
| Binucleate cells counted      | 100 | 100  |
| Cells with Micronuclei:       | 1   | 25   |
| Micronuclei per aberrant cell | 1   | 1.32 |

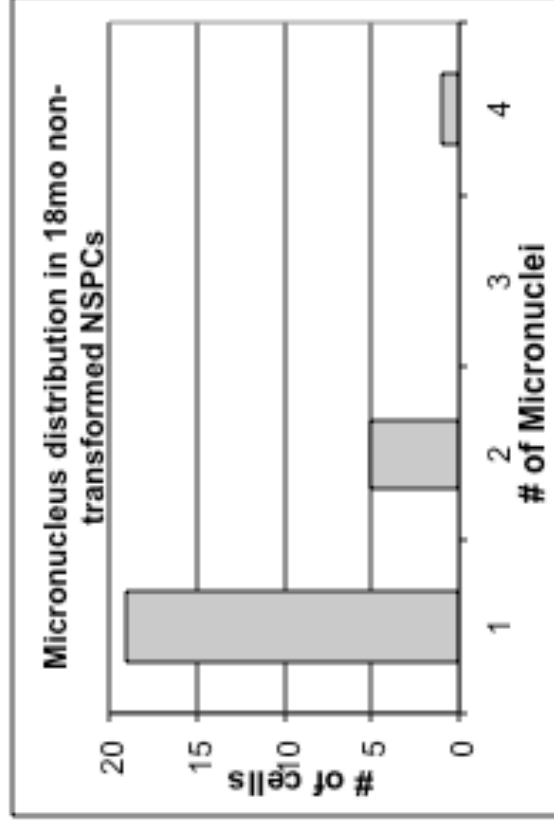

Supplement: NIHMS413431-supplement-Fig2S.pdf [file NIHMS413431-supplement-Fig2S.pdf]
