# Supplementary material
Source: PubMed Central journal article supplement (PMC3504614)
Supplement: NIHMS413431-supplement-Fig3S.pdf [file NIHMS413431-supplement-Fig3S.pdf]

**Figure 3S** Cytogenetic analysis of 3mo and 18mo transformed NSPCs

|                      | chromosome<br>number | breaks* | exchanges | aneuploid |
|----------------------|----------------------|---------|-----------|-----------|
| <b>3mo Tr-NSPCs</b>  |                      |         |           |           |
| Cells counted        | 100                  | 100     | 100       | 100       |
| Mean                 | 43.66                | 0.18    | 0         | 0.11      |
| Standard Error       | 1.14                 | 0.05    | 0         | 0.03      |
| <b>18mo Tr-NSPCs</b> |                      |         |           |           |
| Cells counted        | 100                  | 100     | 100       | 100       |
| Mean                 | 42.89                | 0.38    | 0.05      | 0.10      |
| Standard Error       | 0.95                 | 0.07    | 0.04      | 0.03      |

\* p=0.018
