# Supplementary material
Source: PubMed Central journal article supplement (PMC3504614)

Figure 5S. Differential expression of genes in young (<40yo) and aged (>55yo) human malignant glioma patients.

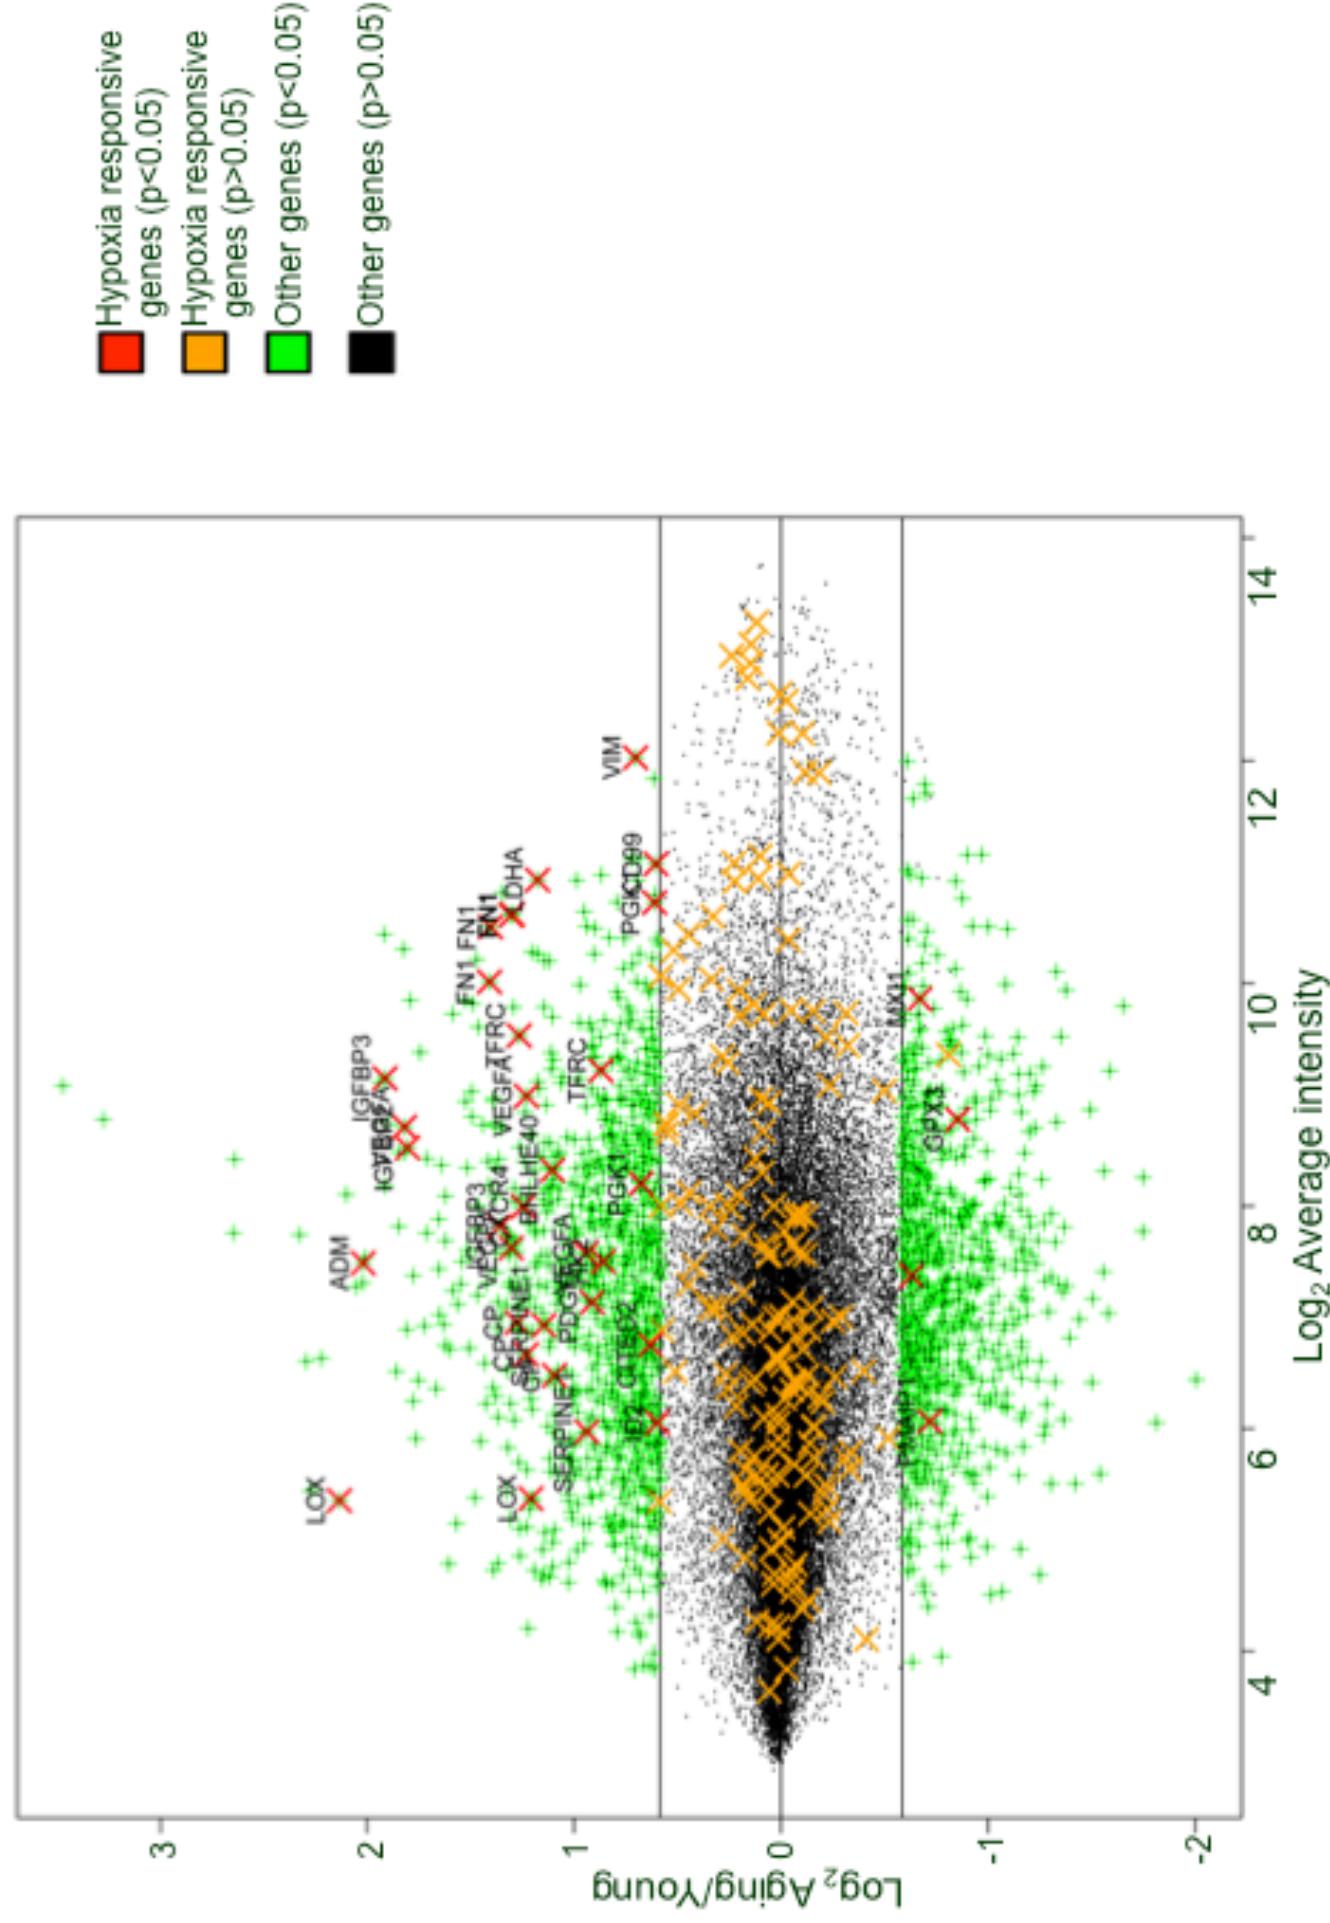

Supplement: NIHMS413431-supplement-Fig5S.pdf [file NIHMS413431-supplement-Fig5S.pdf]
