# Supplementary material
Source: PubMed Central journal article supplement (PMC3504614)
Supplement: NIHMS413431-supplement-Table1S.pdf [file NIHMS413431-supplement-Table1S.pdf]

**Table 1S Summary of histologic features**

| Cell age      | Host age | necrosis | vascular | mitoses   |          | grade    |          |
|---------------|----------|----------|----------|-----------|----------|----------|----------|
|               |          |          |          | freq      | moderate | III      | IV       |
| 18mo Tr-NSPCs | young    | 1        | 0        | 2         | 1        | 4        | 1        |
| 18mo Tr-NSPCs | aging    | 2        | 2        | 3         | 2        | 3        | 2        |
| <b>Total</b>  |          | <b>3</b> | <b>2</b> | <b>5</b>  | <b>3</b> | <b>7</b> | <b>3</b> |
| 3mo Tr-NSPCs  | young    | 2        | 2        | 4         | 1        | 4        | 2        |
| 3mo Tr-NSPCs  | aging    | 1        | 0        | 6         | 0        | 5        | 1        |
| <b>Total</b>  |          | <b>3</b> | <b>2</b> | <b>10</b> | <b>1</b> | <b>9</b> | <b>3</b> |

| Cell age      | Host age | cellularity |           | hemorrhage  |             |          |
|---------------|----------|-------------|-----------|-------------|-------------|----------|
|               |          | high        | medium    | large areas | small areas | absent   |
| 18mo Tr-NSPCs | young    | 3           | 2         | 2           | 2           | 1        |
| 18mo Tr-NSPCs | aging    | 1           | 4         | 2           | 2           | 1        |
| <b>Total</b>  |          | <b>4</b>    | <b>6</b>  | <b>4</b>    | <b>4</b>    | <b>2</b> |
| 3mo Tr-NSPCs  | young    | 2           | 4         | 2           | 1           | 3        |
| 3mo Tr-NSPCs  | aging    | 0           | 6         | 1           | 0           | 5        |
| <b>Total</b>  |          | <b>2</b>    | <b>10</b> | <b>3</b>    | <b>1</b>    | <b>8</b> |

| Cell age      | Host age | infiltration |          |          | pleomorphism |          |          |
|---------------|----------|--------------|----------|----------|--------------|----------|----------|
|               |          | high         | medium   | low      | High         | medium   | low      |
| 18mo Tr-NSPCs | young    | 1            | 2        | 2        | 2            | 0        | 3        |
| 18mo Tr-NSPCs | aging    | 2            | 2        | 1        | 0            | 5        | 0        |
| <b>Total</b>  |          | <b>3</b>     | <b>4</b> | <b>3</b> | <b>2</b>     | <b>5</b> | <b>3</b> |
| 3mo Tr-NSPCs  | young    | 2            | 0        | 4        | 2            | 2        | 2        |
| 3mo Tr-NSPCs  | aging    | 0            | 2        | 4        | 1            | 3        | 2        |
| <b>Total</b>  |          | <b>2</b>     | <b>2</b> | <b>8</b> | <b>3</b>     | <b>5</b> | <b>4</b> |

| Cell age      | Host age | Growth pattern |              |              | tumor area |          |          |
|---------------|----------|----------------|--------------|--------------|------------|----------|----------|
|               |          | fascicles      | mixed growth | multinodular | large      | medium   | small    |
| 18mo Tr-NSPCs | young    | 2              | 0            | 3            | 2          | 2        | 1        |
| 18mo Tr-NSPCs | aging    | 0              | 1            | 4            | 1          | 2        | 2        |
| <b>Total</b>  |          | <b>2</b>       | <b>1</b>     | <b>7</b>     | <b>3</b>   | <b>4</b> | <b>3</b> |
| 3mo Tr-NSPCs  | young    | 3              | 0            | 1            | 5          | 0        | 1        |
| 3mo Tr-NSPCs  | aging    | 5              | 0            | 2            | 3          | 1        | 2        |
| <b>Total</b>  |          | <b>8</b>       | <b>0</b>     | <b>3</b>     | <b>8</b>   | <b>1</b> | <b>3</b> |
