# Supplementary material
Source: PubMed Central journal article supplement (PMC3504614)
Supplement: NIHMS413431-supplement-Table2S.pdf [file NIHMS413431-supplement-Table2S.pdf]

Table 1S. Known HIF-1 target genes  
 Benita Y, et al. Nucleic Acids Res. 2009 Aug;37(14):4587-602.

| <b>Symbol</b> | <b>Description</b>                                                                | <b>Reference</b>    |
|---------------|-----------------------------------------------------------------------------------|---------------------|
| ABCB1         | ATP-binding cassette, sub-family B (MDR/TAP), member 1                            | PubMed ID: 12067980 |
| ABCG2         | ATP-binding cassette, sub-family G (WHITE), member 2                              | PubMed ID: 15044468 |
| ADM           | adrenomedullin                                                                    | PubMed ID: 13130303 |
| ADRA1B        | adrenergic, alpha-1B-, receptor                                                   | PubMed ID: 13130303 |
| AK3           | adenylate kinase 3                                                                | PubMed ID: 13130303 |
| ALDOA         | aldolase A, fructose-bisphosphate                                                 | PubMed ID: 8955077  |
| BHLHB2        | basic helix-loop-helix domain containing, class B, 2                              | PubMed ID: 12354771 |
| BHLHB3        | basic helix-loop-helix domain containing, class B, 3                              | PubMed ID: 12354771 |
| BNIP3         | BCL2/adenovirus E1B 19kDa interacting protein 3                                   | PubMed ID: 12879018 |
| BNIP3L        | BCL2/adenovirus E1B 19kDa interacting protein 3-like                              | PubMed ID: 13130303 |
| CA9           | carbonic anhydrase IX                                                             | PubMed ID: 15184875 |
| CCNG2         | cyclin G2                                                                         | PubMed ID: 13130303 |
| CD99          | CD99 molecule                                                                     | PubMed ID: 13130303 |
| CDKN1A        | cyclin-dependent kinase inhibitor 1A (p21, Cip1)                                  | PubMed ID: 13130303 |
| CITED2        | Cbp/p300-interacting transactivator, with Glu/Asp-rich carboxy-terminal domain, 2 | PubMed ID: 9887100  |
| COL5A1        | collagen, type V, alpha 1                                                         | PubMed ID: 13130303 |
| CP            | ceruloplasmin (ferroxidase)                                                       | PubMed ID: 10777486 |
| CTGF          | connective tissue growth factor                                                   | PubMed ID: 15315937 |
| CTSD          | cathepsin D                                                                       | PubMed ID: 13130303 |
| CXCL12        | chemokine (C-X-C motif) ligand 12 (stromal cell-derived factor 1)                 | PubMed ID: 15235597 |
| CXCR4         | chemokine (C-X-C motif) receptor 4                                                | PubMed ID: 13679920 |
| CYP2S1        | cytochrome P450, family 2, subfamily S, polypeptide 1                             | PubMed ID: 17277313 |
| DDIT4         | DNA-damage-inducible transcript 4                                                 | PubMed ID: 13130303 |
| DEC1          | deleted in esophageal cancer 1                                                    | PubMed ID: 13130303 |
| EDN1          | endothelin 1                                                                      | PubMed ID: 15132980 |
| EGLN1         | egl nine homolog 1 (C. elegans)                                                   | PubMed ID: 15563275 |
| EGLN3         | egl nine homolog 3 (C. elegans)                                                   | PubMed ID: 15823097 |
| ENG           | endoglin (Osler-Rendu-Weber syndrome 1)                                           | PubMed ID: 12228247 |
| ENO1          | enolase 1, (alpha)                                                                | PubMed ID: 8955077  |
| EPO           | erythropoietin                                                                    | PubMed ID: 8408001  |
| ETS1          | v-ets erythroblastosis virus E26 oncogene homolog 1 (avian)                       | PubMed ID: 11708773 |
| FECH          | ferrochelatase (protoporphyrin)                                                   | PubMed ID: 15312748 |
| FN1           | fibronectin 1                                                                     | PubMed ID: 13130303 |
| FURIN         | furin (paired basic amino acid cleaving enzyme)                                   | PubMed ID: 15611046 |
| GAPDH         | glyceraldehyde-3-phosphate dehydrogenase                                          | PubMed ID: 10542317 |
| GPI           | glucose phosphate isomerase                                                       | PubMed ID: 13130303 |
| GPX3          | glutathione peroxidase 3 (plasma)                                                 | PubMed ID: 15096516 |
| HK1           | hexokinase 1                                                                      | PubMed ID: 13130303 |

|          |                                                                                               |                     |
|----------|-----------------------------------------------------------------------------------------------|---------------------|
| HK2      | hexokinase 2                                                                                  | PubMed ID: 13130303 |
| HMOX1    | heme oxygenase (decycling) 1                                                                  | PubMed ID: 13130303 |
| HSP90B1  | heat shock protein 90kDa beta (Grp94), member 1                                               | PubMed ID: 15620698 |
| ID2      | inhibitor of DNA binding 2, dominant negative helix-loop-helix protein                        | PubMed ID: 15252039 |
| IGF2     | insulin-like growth factor 2 (somatomedin A)                                                  | PubMed ID: 13130303 |
| IGFBP1   | insulin-like growth factor binding protein 1                                                  | PubMed ID: 9707622  |
| IGFBP2   | insulin-like growth factor binding protein 2, 36kDa                                           | PubMed ID: 13130303 |
| IGFBP3   | insulin-like growth factor binding protein 3                                                  | PubMed ID: 13130303 |
| ITGB2    | integrin, beta 2 (complement component 3 receptor 3 and 4 subunit)                            | PubMed ID: 15235127 |
| KRT14    | keratin 14 (epidermolysis bullosa simplex, Dowling-Meara, Koebner)                            | PubMed ID: 13130303 |
| KRT18    | keratin 18                                                                                    | PubMed ID: 13130303 |
| KRT19    | keratin 19                                                                                    | PubMed ID: 13130303 |
| LDHA     | lactate dehydrogenase A                                                                       | PubMed ID: 13130303 |
| LEP      | leptin                                                                                        | PubMed ID: 12215445 |
| LOX      | lysyl oxidase                                                                                 | PubMed ID: 16642001 |
| LRP1     | low density lipoprotein-related protein 1 (alpha-2-macroglobulin receptor)                    | PubMed ID: 13130303 |
| MCL1     | myeloid cell leukemia sequence 1 (BCL2-related)                                               | PubMed ID: 15611089 |
| MET      | met proto-oncogene (hepatocyte growth factor receptor)                                        | PubMed ID: 12726861 |
| MMP14    | matrix metalloproteinase 14 (membrane-inserted)                                               | PubMed ID: 15592504 |
| MMP2     | matrix metalloproteinase 2 (gelatinase A, 72kDa gelatinase, 72kDa type IV collagenase)        | PubMed ID: 13130303 |
| MXI1     | MAX interactor 1                                                                              | PubMed ID: 17482131 |
| NOS2A    | nitric oxide synthase 2A (inducible, hepatocytes)                                             | PubMed ID: 13130303 |
| NOS3     | nitric oxide synthase 3 (endothelial cell)                                                    | PubMed ID: 12963737 |
| NPM1     | nucleophosmin (nucleolar phosphoprotein B23, numatrin)                                        | PubMed ID: 15310764 |
| NR4A1    | nuclear receptor subfamily 4, group A, member 1                                               | PubMed ID: 13130303 |
| NT5E     | 5'-nucleotidase, ecto (CD73)                                                                  | PubMed ID: 12370277 |
| PDGFA    | platelet-derived growth factor alpha polypeptide                                              | PubMed ID: 15132980 |
| PDK1     | pyruvate dehydrogenase kinase, isozyme 1                                                      | PubMed ID: 16517405 |
| PFKFB3   | 6-phosphofructo-2-kinase/fructose-2,6-biphosphatase 3                                         | PubMed ID: 15466858 |
| PFKL     | phosphofructokinase, liver                                                                    | PubMed ID: 13130303 |
| PGK1     | phosphoglycerate kinase 1                                                                     | PubMed ID: 8955077  |
| PH-4     | hypoxia-inducible factor prolyl 4-hydroxylase                                                 | PubMed ID: 13130303 |
| PKM2     | pyruvate kinase, muscle                                                                       | PubMed ID: 13130303 |
| PLAUR    | plasminogen activator, urokinase receptor                                                     | PubMed ID: 13130303 |
| PMAIP1   | phorbol-12-myristate-13-acetate-induced protein 1                                             | PubMed ID: 14699081 |
| PPP5C    | protein phosphatase 5, catalytic subunit                                                      | PubMed ID: 15328343 |
| PROK1    | prokineticin 1                                                                                | PubMed ID: 13130303 |
| SERPINE1 | serpin peptidase inhibitor, clade E (nexin, plasminogen activator inhibitor type 1), member 1 | PubMed ID: 11877282 |
| SLC2A1   | solute carrier family 2 (facilitated glucose transporter), member 1                           | PubMed ID: 13130303 |

|       |                                                                                 |                     |
|-------|---------------------------------------------------------------------------------|---------------------|
| TERT  | telomerase reverse transcriptase                                                | PubMed ID: 15199161 |
| TF    | transferrin                                                                     | PubMed ID: 9242677  |
| TFF3  | trefoil factor 3 (intestinal)                                                   | PubMed ID: 11342587 |
| TFRC  | transferrin receptor (p90, CD71)                                                | PubMed ID: 10446187 |
| TGFA  | transforming growth factor, alpha                                               | PubMed ID: 13130303 |
| TGFB3 | transforming growth factor, beta 3                                              | PubMed ID: 15155569 |
| TGM2  | transglutaminase 2 (C polypeptide, protein-glutamine-gamma-glutamyltransferase) | PubMed ID: 13130303 |
| TPI1  | triosephosphate isomerase 1                                                     | PubMed ID: 13130303 |
| VEGFA | vascular endothelial growth factor A                                            | PubMed ID: 8756616  |
| VIM   | vimentin                                                                        | PubMed ID: 13130303 |
