# Supplementary material
Source: PubMed Central journal article supplement (PMC3504614)
Supplement: NIHMS413431-supplement-Table3S.pdf [file NIHMS413431-supplement-Table3S.pdf]

**Table 3S** Primers for qRT-PCR

| <b>Gene</b>   | <b>Forward</b>                          | <b>Reverse</b>                          |
|---------------|-----------------------------------------|-----------------------------------------|
| VegfA         | 5'- GGC CTC CGA AAC CAT GAA CTT TCT -3' | 5'- ATG GGA CTT CTG CTC TCC TTC TGT -3' |
| Adm           | 5'- TCG GCT TCT CAT CGC AGT CAA TCT -3' | 5'- TCA GGG TGA TGG AAA CCA GCT TCA -3' |
| Fn1           | 5'- GCT TTA AGC TCA CAT GCC AGT GCT -3' | 5'- GAC ACC GTT GTC ATG GCA CCA TTT -3' |
| Hk2           | 5'- TCT GGA CCT TGG AGG AAC CAA CTT -3' | 5'- CAG GCA TTC GGC AAT GTG GTC AAA -3' |
| Ldha          | 5'- TGT GTG GAG TGG TGT GAA TGT TGC -3' | 5'- TTC AGC TTG ATC ACC TCG TAG GCA -3' |
| Lox           | 5'- AAC ACA CAG AGG AGA GTG GCT GAA -3' | 5'- AGT CTA TGT CTG CCG CAT AGG TGT -3' |
| $\beta$ Actin | 5'- ACC TTC TAC AAT GAG CTG CG -3'      | 5'- CTG GAT GGC TAC GTA CAT GG -3'      |
