# Supplementary material
Source: PubMed Central journal article supplement (PMC3504614)

Figure 1S: Representative photomicrograph of 3mo and 18mo Tr NSPC derived gliomas.

C

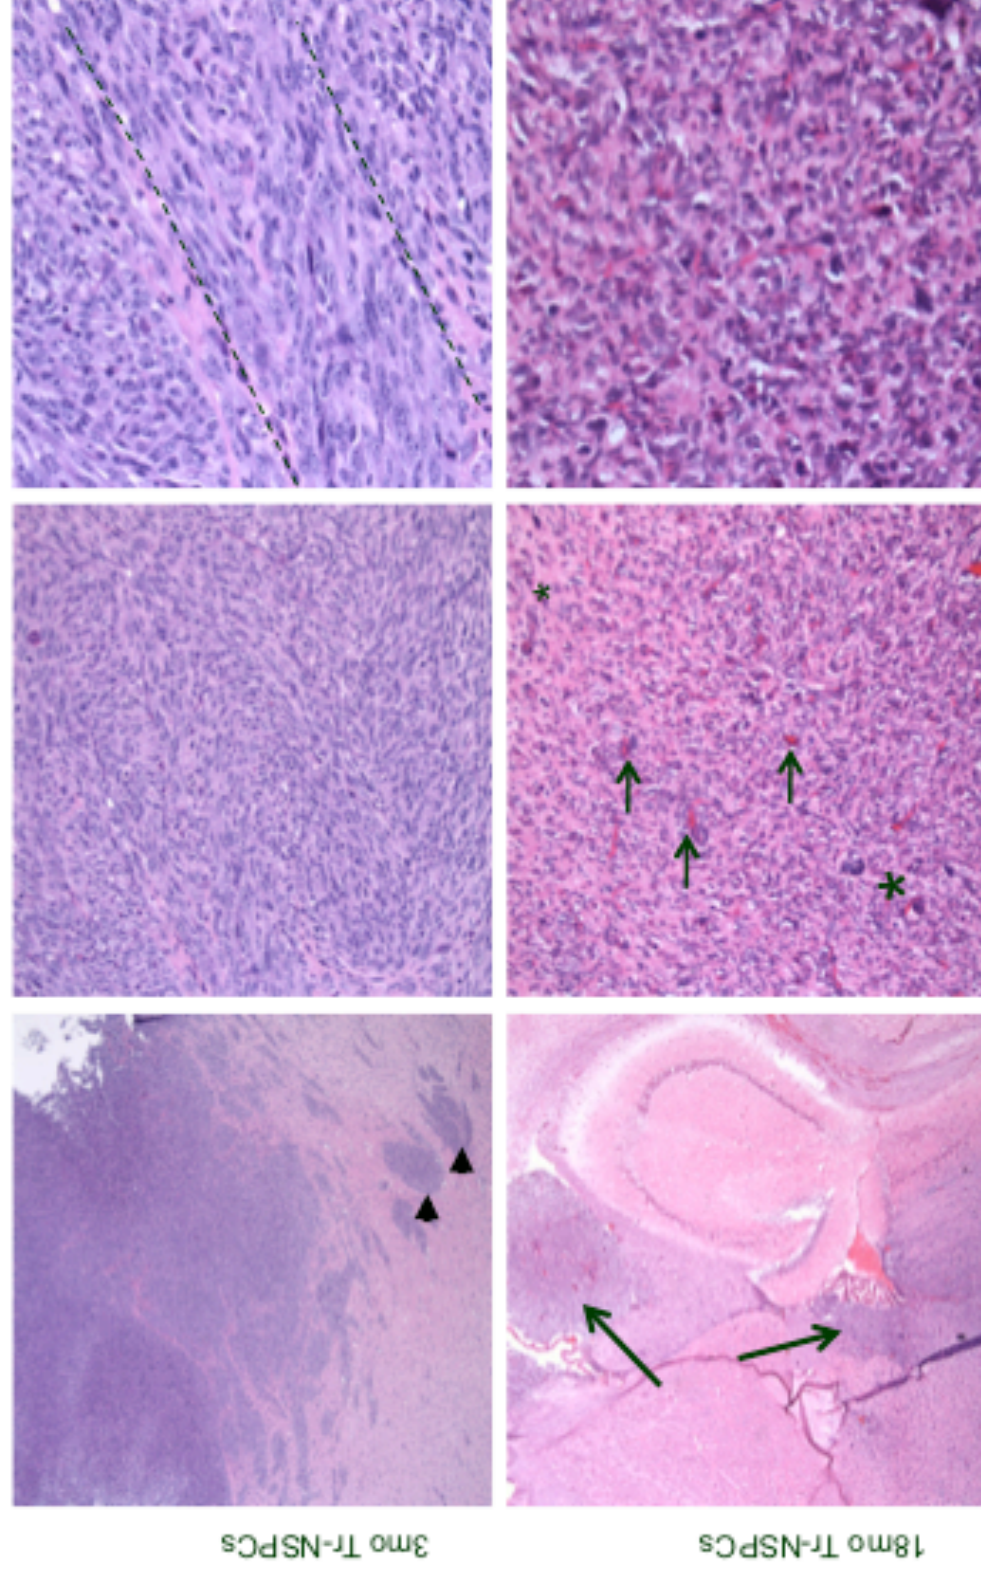

Supplement: NIHMS413431-supplement-Fig1S.pdf [file NIHMS413431-supplement-Fig1S.pdf]

Figure 4S Differentiation potential of transformed NSPCs.

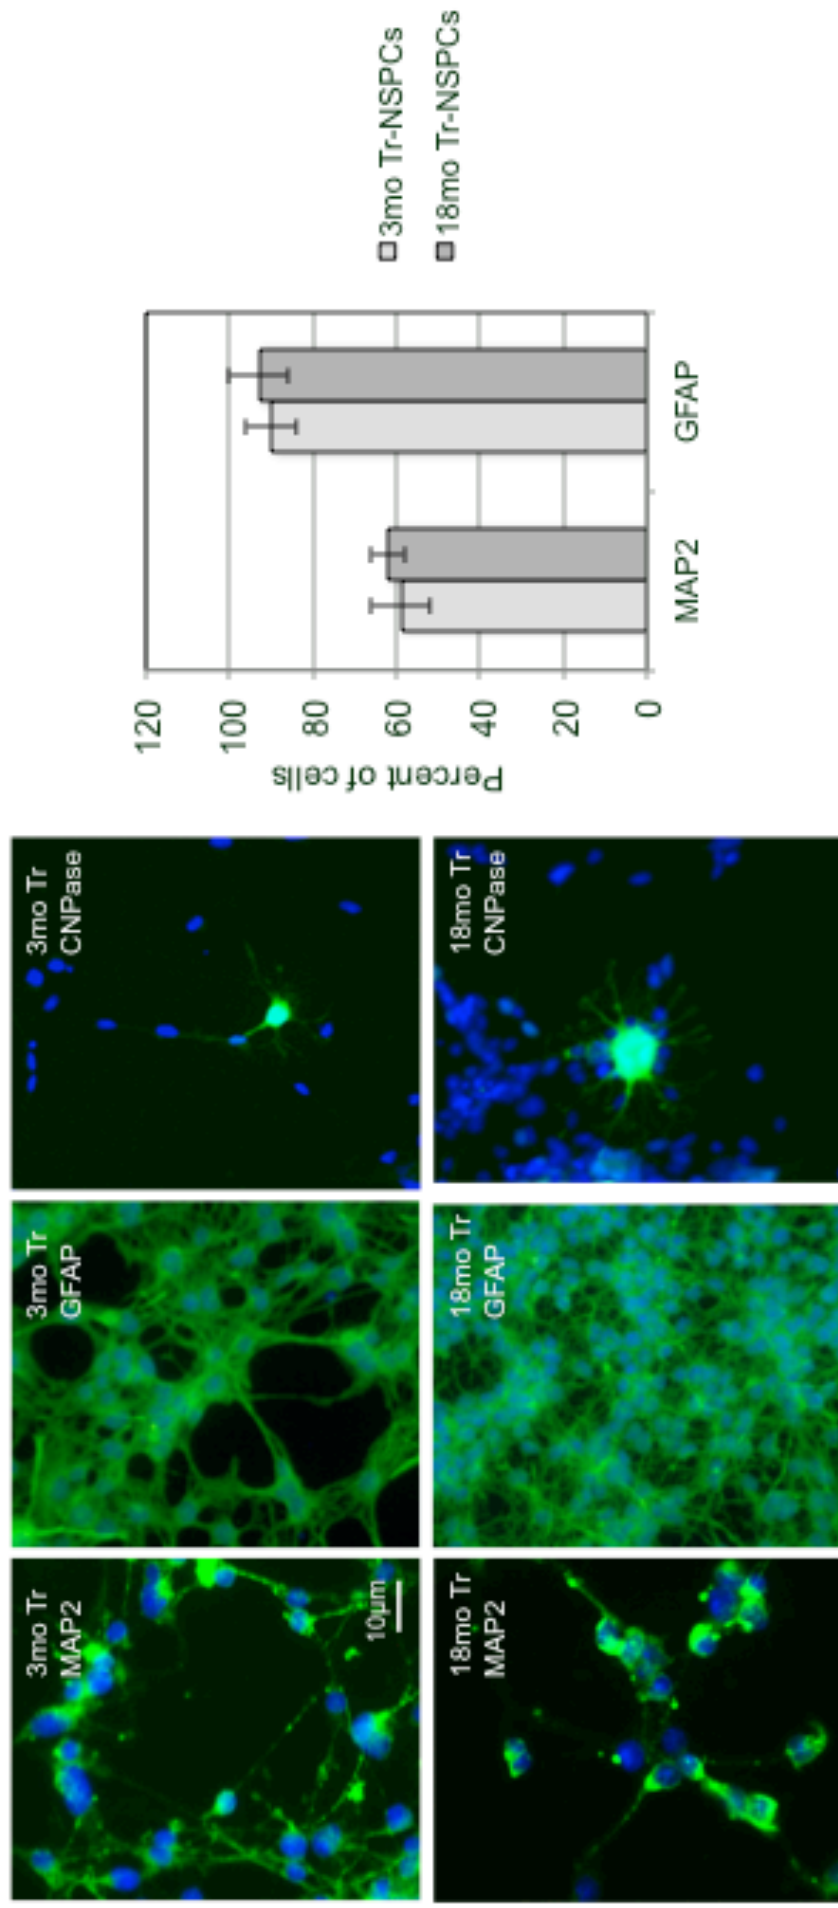

Supplement: NIHMS413431-supplement-Fig4S.pdf [file NIHMS413431-supplement-Fig4S.pdf]
